# Supplementary material for: Thermal instability originating from the interface between organic–inorganic hybrid perovskites and oxide electron transport layers
Source: Royal Society of Chemistry journal article supplement (doi:10.1039/d2ee02649j), 2022-01-01
Supplement: d2ee02649j1.pdf [file d2ee02649j1.pdf]

**Thermal Instability Originating from the Interface between Organic-Inorganic  
Hybrid Perovskite and Oxide Electron Transport layers**

Jingsi Song,<sup>a#</sup> Hongpeng Liu,<sup>a#</sup> Wenhua Pu,<sup>b#</sup> Yue Lu,<sup>a\*</sup> Zhixiang Si,<sup>a</sup> Zeyu Zhang,<sup>a</sup>  
Yang Ge,<sup>a</sup> Nengxu Li,<sup>c</sup> Huanping Zhou,<sup>c</sup> Wei Xiao,<sup>b\*</sup> Ligen Wang,<sup>b</sup> Manling Sui<sup>a\*</sup>

<sup>a</sup>Beijing Key Laboratory of Microstructure and Properties of Solids, Faculty of Materials and Manufacturing, Institute of Microstructure and Properties of Advanced Materials, Beijing University of Technology, Beijing, 100124, China.

<sup>b</sup>State Key Laboratory of Nonferrous Metals and Processes, GRIMAT Group Co., Ltd; GRIMAT Engineering Institute Co., Ltd., Beijing 100088, China

<sup>c</sup>Beijing Key Laboratory for Theory and Technology of Advanced Battery Materials, Key Laboratory of Polymer Chemistry and Physics of Ministry of Education, BIC-ESAT, Department of Materials Science and Engineering, College of Engineering, Peking University, Beijing 100871, P.R. China.

# These authors are eco-contribution.

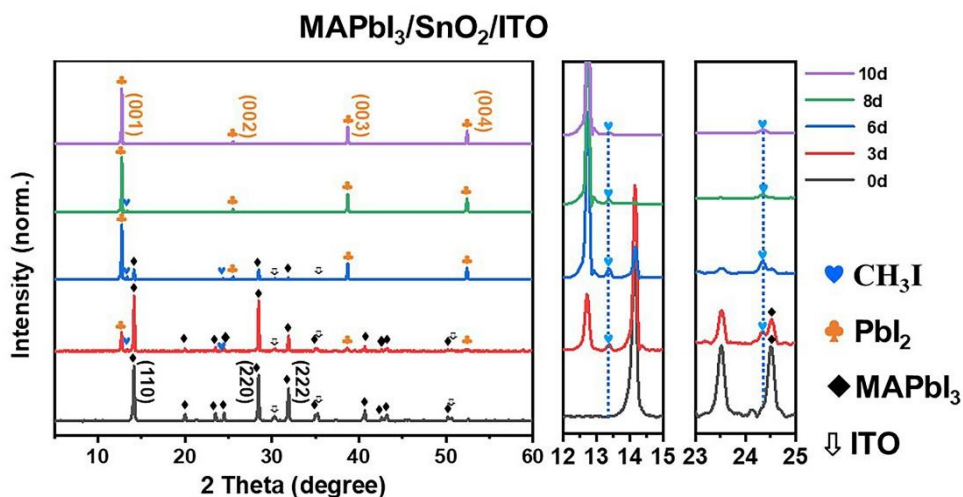

**Fig. S1 X-Ray diffraction pattern analyses of the MAPbI<sub>3</sub> films on the SnO<sub>2</sub>-ITO substrate after thermal treatment for different times.** The black indexes correspond to the structure of the tetragonal perovskite and the orange indexes correspond to the structure of lead iodide. Magnified images for the regions of 12~15 degrees and 23~25 degrees were presented on the right side to show the peaks of CH<sub>3</sub>I-like phase. The PbI<sub>2</sub> could be characterized as 2H-PbI<sub>2</sub> (space group:  $P\bar{3}m1$ ,  $a=b=4.558\text{\AA}$ ,  $c=6.986\text{\AA}$ ).

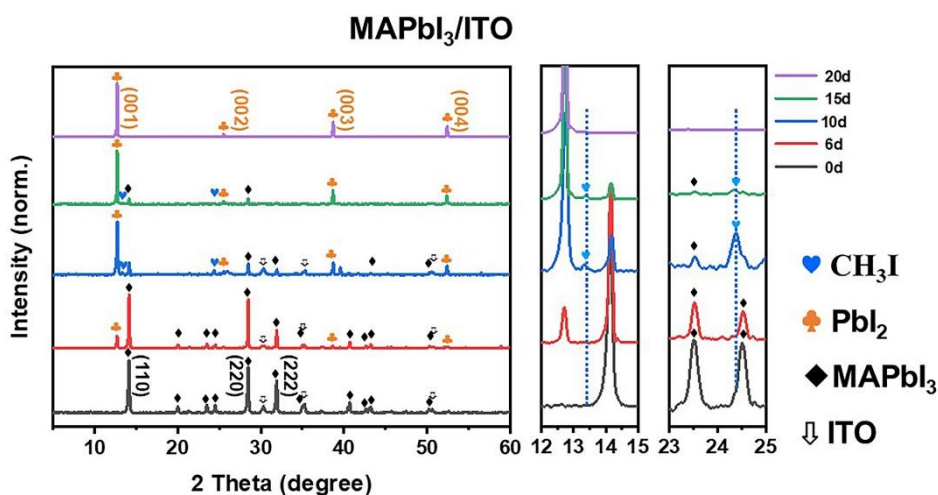

**Fig. S2 X-Ray diffraction pattern analyses of the MAPbI<sub>3</sub> films on ITO substrates after thermal treatment.** The degradation process of MAPbI<sub>3</sub> film is very similar to the ones on SnO<sub>2</sub>-ITO glasses.

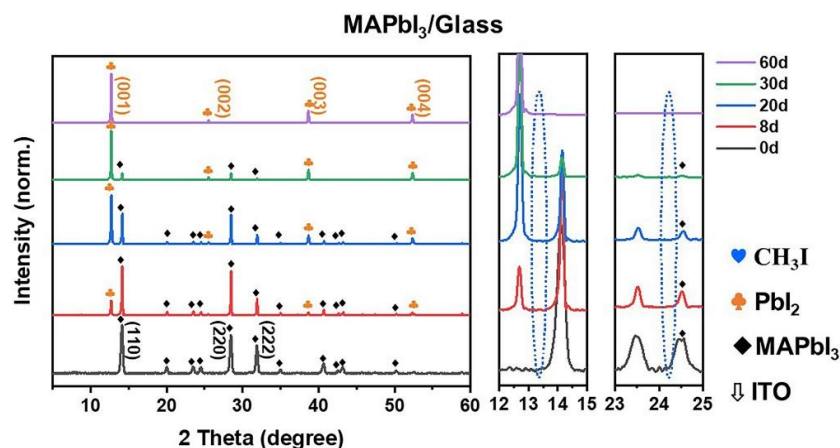

**Fig. S3 X-Ray diffraction pattern analyses of the thermal treated MAPbI<sub>3</sub> films on the bare glass.** The degradation process from MAPbI<sub>3</sub> into PbI<sub>2</sub> is similar to the ones on SnO<sub>2</sub>-ITO and ITO glasses, but there is no CH<sub>3</sub>I-like phase generated.

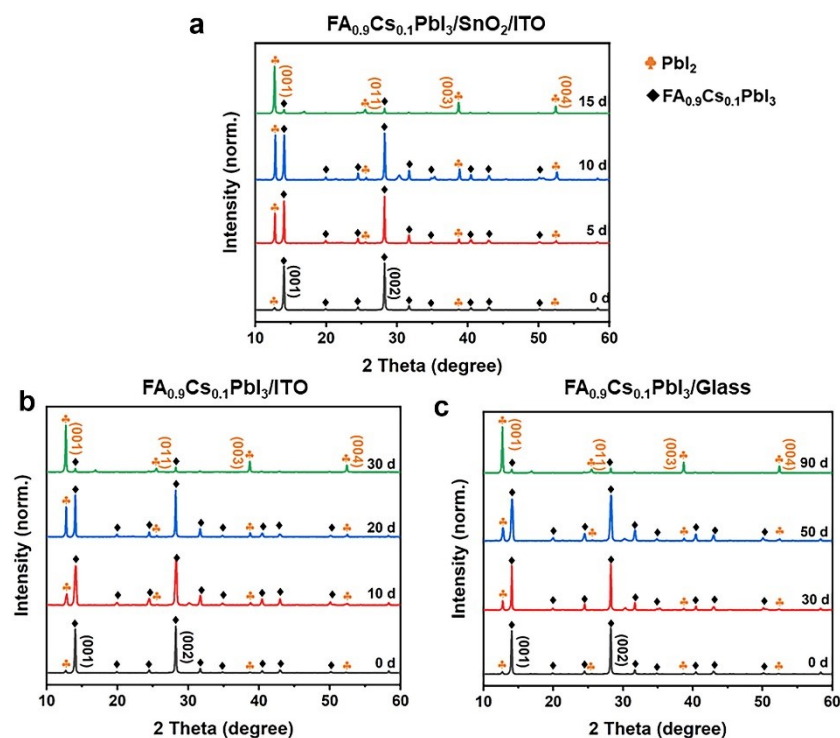

**Fig. S4 Evolution for the crystal structures of FA<sub>0.9</sub>Cs<sub>0.1</sub>PbI<sub>3</sub> films during thermal treatment on SnO<sub>2</sub>-ITO, ITO and bare glass substrates, respectively. a-c** X-Ray diffraction patterns analyses on the FA<sub>0.9</sub>Cs<sub>0.1</sub>PbI<sub>3</sub> films on (a) SnO<sub>2</sub>-ITO, (b) ITO and (c) bare glass substrates after thermal treatment for different times. The black indexes correspond to the structure of the cubic perovskite and the orange indexes correspond to the structure of lead iodide.

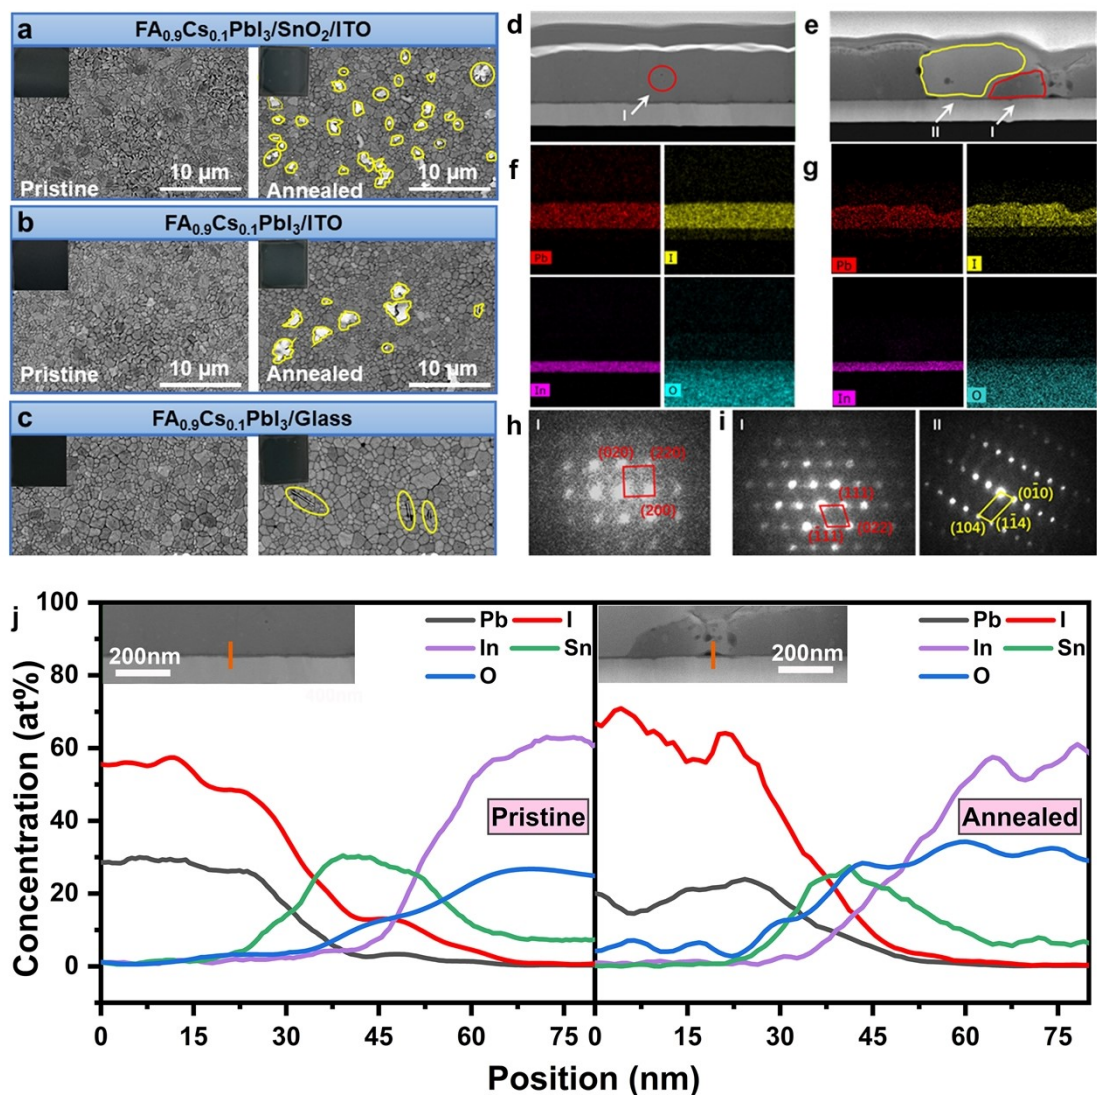

**Fig. S5 SEM and TEM observation for the morphology, structure and elementary evolution of the annealed perovskite films on the different substrates. a-c)** SEM characterizations of the morphology evolution of spin-coated  $\text{FA}_{0.9}\text{Cs}_{0.1}\text{PbI}_3$  perovskite films before and after thermal treatment for 3 days on three different substrates of  $\text{SnO}_2/\text{ITO}$  glass (a), ITO glass (b) and bare glass (c), respectively. Insets show the optical images of the films. Yellow polygon areas indicate the  $\text{PbI}_2$  grains. **d, e)** HAADF images of the perovskite films on the  $\text{SnO}_2/\text{ITO}$  glass after thermal degradation for 0 and 3 days, respectively. Red and yellow polygon areas indicate the  $\text{FA}_{0.9}\text{Cs}_{0.1}\text{PbI}_3$  and  $\text{PbI}_2$  grains. **f, g)** EDS mapping of the cross-sectional perovskite films on  $\text{SnO}_2/\text{ITO}$  glasses after thermal degradation for 0 and 3 days, respectively. **h, i)** NBD patterns of the perovskite films on  $\text{SnO}_2/\text{ITO}$  glass, which are captured at the areas I (red area) and II (yellow area) in **d, e**. **j)** The EDS line scan of the elementary distributions along the

red lines at the interfaces (insets of the HAADF images of the detail interface) between  $\text{FA}_{0.9}\text{Cs}_{0.1}\text{PbI}_3$  and  $\text{SnO}_2$ .

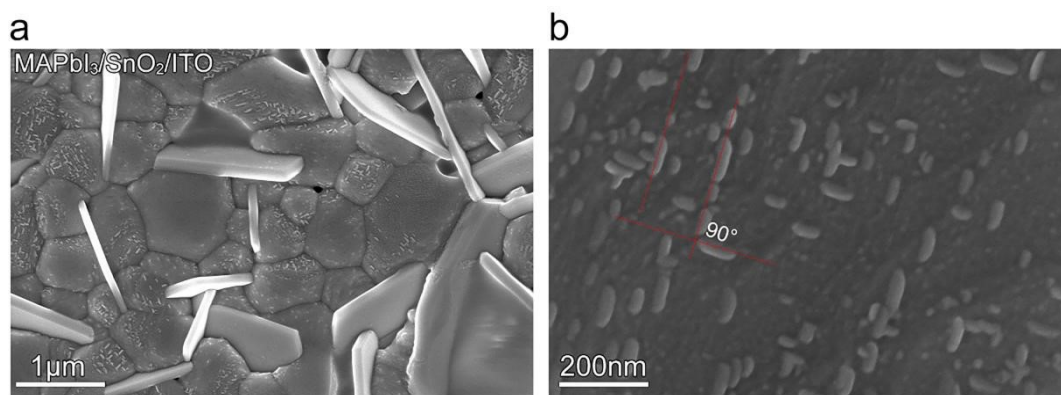

**Fig. S6 SEM image of the  $\text{MAPbI}_3$  film after thermal treatment of 8 days.** Except for the appearance of flaky  $\text{PbI}_2$  grains at the grain boundaries of perovskite, large number of fine lead iodide grains have been grown out of the surface of  $\text{MAPbI}_3$  film, which are with a certain crystallographic angle of about 90 degree.

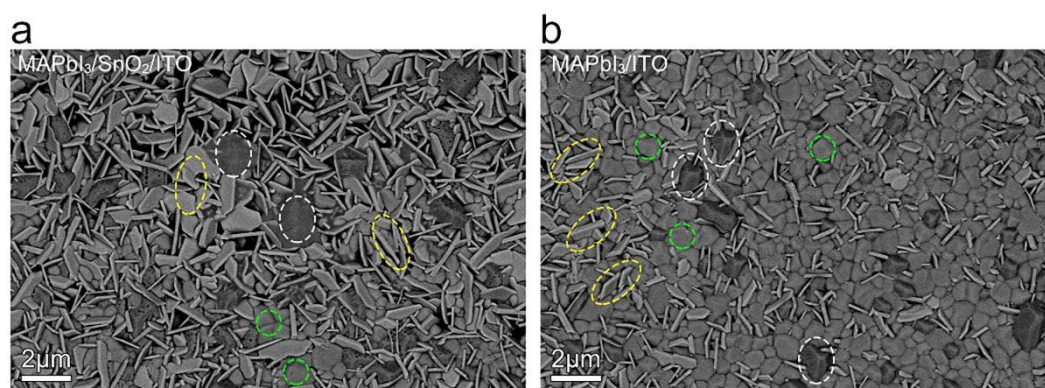

**Fig. S7 Top-view back scattered electron (BSE) images of the annealed  $\text{MAPbI}_3$  films fabricated on the  $\text{SnO}_2$ -ITO and ITO glass substrates, respectively.** The contrast of the BSE images is proportional to the average atomic number of materials. So, as shown in **a** and **b**, the dark contrast of the nanograins (marked with white dash circles) indicates its containing of light elements, which corresponds to the  $\text{CH}_3\text{I}$ -like phase as shown in Figs. S1 and S2. While the flaky grains are  $\text{PbI}_2$  (marked with yellow dash circles) and the other grains are with  $\text{MAPbI}_3$  phase (marked with green dash circles). All the films were thermally treated at  $85\ ^\circ\text{C}$  for 8 days.

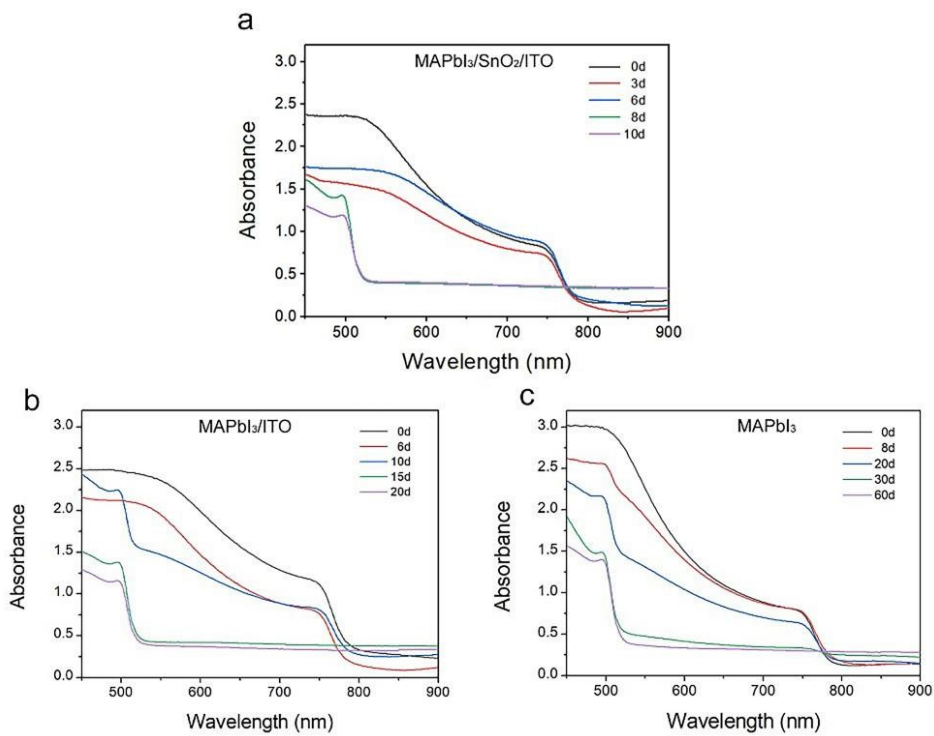

**Fig. S8 UV-vis absorbance spectra of the thermally treated MAPbI<sub>3</sub> Perovskite film on SnO<sub>2</sub>-ITO, ITO and glass substrates, respectively.** The absorption characteristics of perovskite MAPbI<sub>3</sub> is at 750 nm and lead iodide is at 500 nm, all of these data exhibit the transformation from perovskite into lead iodide.

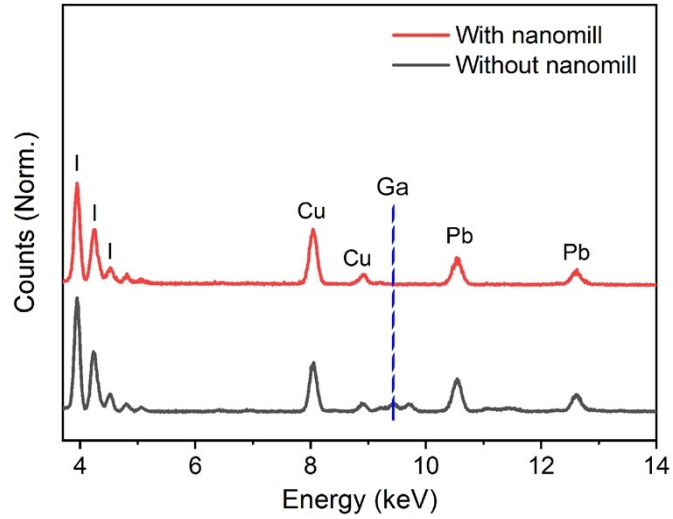

**Fig. S9** The EDS spectra of the  $\text{MAPbI}_3$  layer before and after the nanomill treatment. The FIB-SEM prepared perovskite samples were ion cleaned by Fischione's Model 1040 Nanomill, which can effectively eliminate the damage of Ga ion on the sample surface layer. After slicing the samples, the thickness of them is about  $0.25 \mu\text{m}$ .

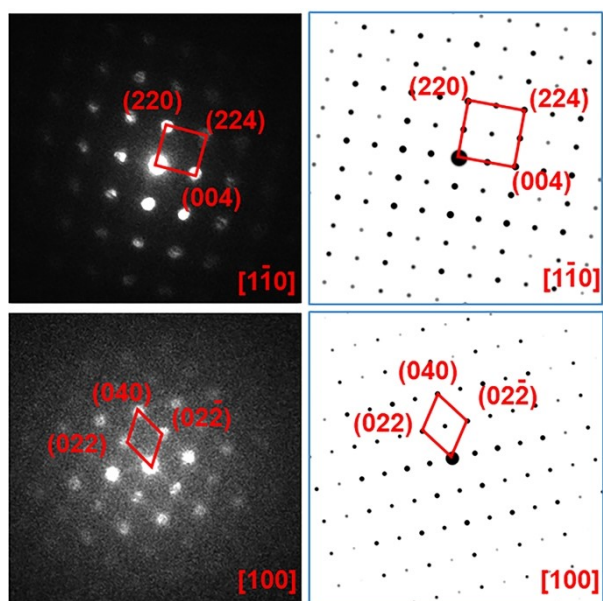

**Fig. S10 NBD patterns of the MAPbI<sub>3</sub> film.** **a, b)** The NBD pattern could be identified as tetragonal perovskite along  $[1\bar{1}0]$  zone axis. However, comparing with the simulation result, (110) and (002) diffraction spots become dimmer. **c, d)** Another NBD pattern should be tetragonal perovskite along  $[100]$  zone axis, but with the extinction of (110) diffraction spot. All the dim diffraction spots maybe resulted by beam damage or defect generation<sup>63</sup>. It should point out that, all the NBD patterns could not be characterized as 6H-PbI<sub>2</sub> (space group:  $R\bar{3}m$ ,  $a = b = 4.557 \text{ \AA}$ ,  $c = 20.937 \text{ \AA}$ ) or 2H-PbI<sub>2</sub> (space group:  $P\bar{3}m1$ ,  $a = b = 4.558 \text{ \AA}$ ,  $c = 6.986 \text{ \AA}$ ).



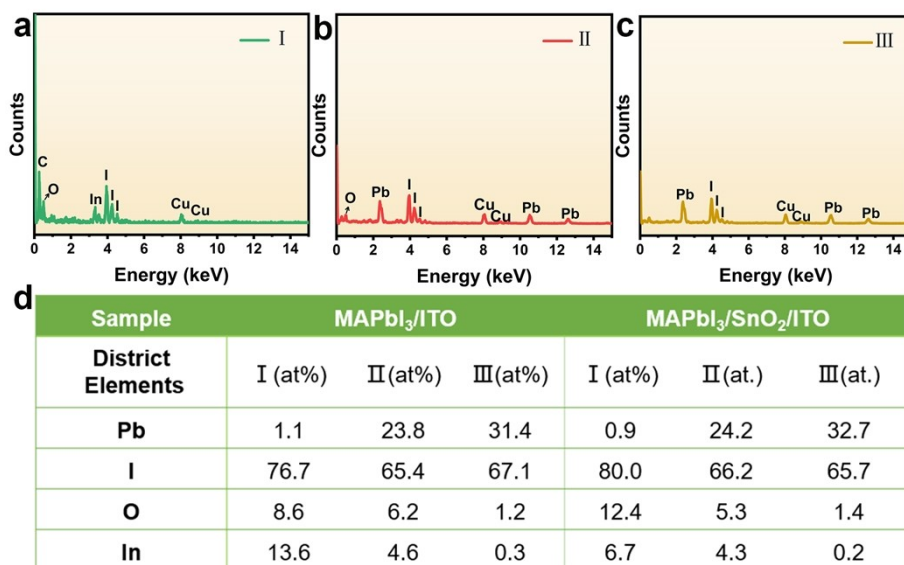

**Fig. S11** Representative EDS spectra at I-III areas. **a-c)** EDS spectra for I-III areas (I CH<sub>3</sub>I-like solid phase, II MAPbI<sub>3</sub>, III PbI<sub>2</sub>) of Fig. 2e. **d)** Table for the element concentration at the regions I-III in the HAADF images of Fig. 2d and Fig. 2e. Region I marked the amorphous CH<sub>3</sub>I region, which contained extremely high concentration of iodine, carbon and oxygen elements. Region II marked the perovskite grains for element mapping. Region III shows a flaky lead-iodine grains with the content ratio close to 1:2 for lead and iodine elements.

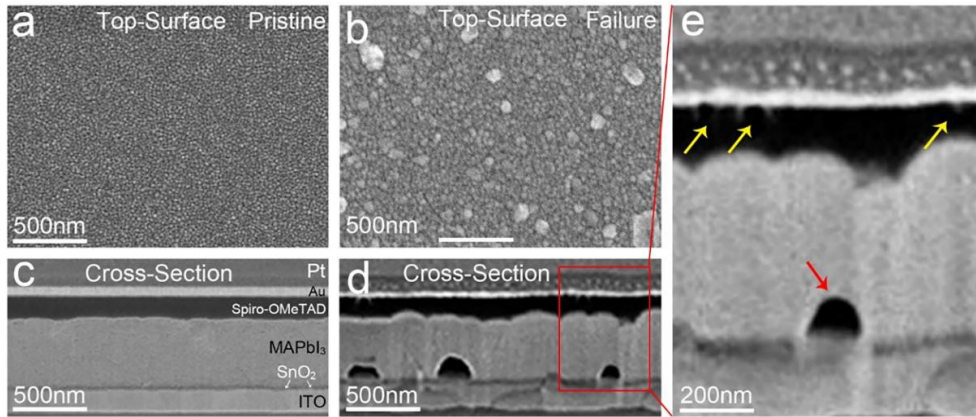

**Fig. S12 Micro-structures of the PSC devices after heating treatment at 85 °C in N<sub>2</sub> gas (in dark) for different times. a, b) SEM images for the top surface morphology of the gold electrodes on the PSC devices before (as pristine) and after annealing 120 hours (as failure). c, d) SEM images of cross-sectional morphology of the pristine and the failure PSC device after thermal treatment for 120 hours, respectively. The thickness of the samples is larger than 2  $\mu\text{m}$ . e) Magnified SEM image for the cross-sectional morphology of PSC device in d (red square area). Yellow arrows indicate pinholes at the interface between Spiro-OMeTAD and gold electrode. Red arrow presents the fault at the MAPbI<sub>3</sub>-SnO<sub>2</sub> interface.**

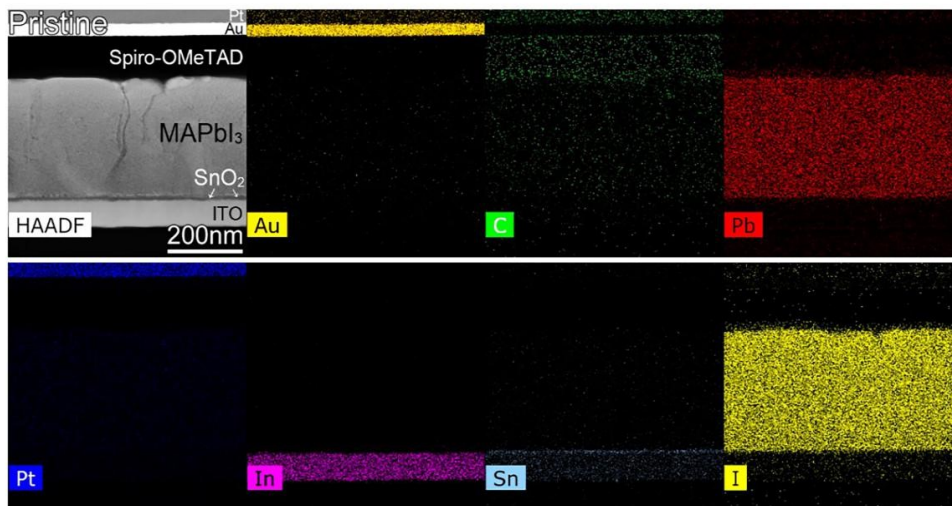

**Fig. S13 The cross-sectional morphology and elementary distribution in the PSC device.** High-angle annular dark-field (HAADF) image of the PSC and the corresponding EDS mapping of the Au, C, Pb, Pt, In, Sn and I elements in the PSC device. The thickness of the sample is about 0.25  $\mu\text{m}$ .

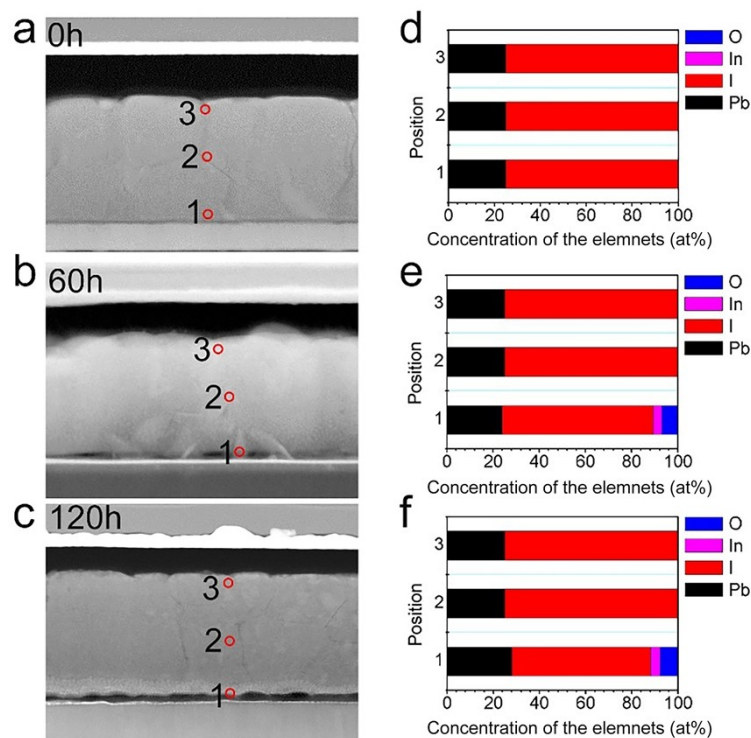

**Fig. S14 Evolution for the morphology and elements in PSCs. a-c)** HAADF images for the cross-section of annealed PSCs. **d-f)** the corresponding elementary distribution at the longitudinal direction of the annealed perovskite films. The thickness of the samples is about 0.25  $\mu\text{m}$ .

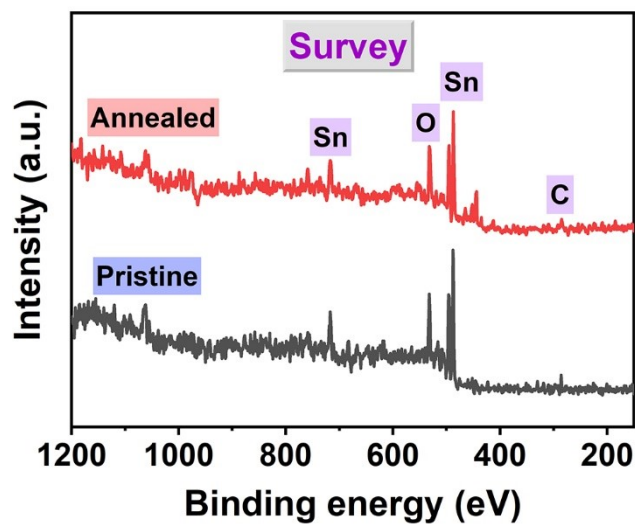

**Fig. S15 The XPS survey spectra of pristine and annealed  $\text{SnO}_2$  layers.**

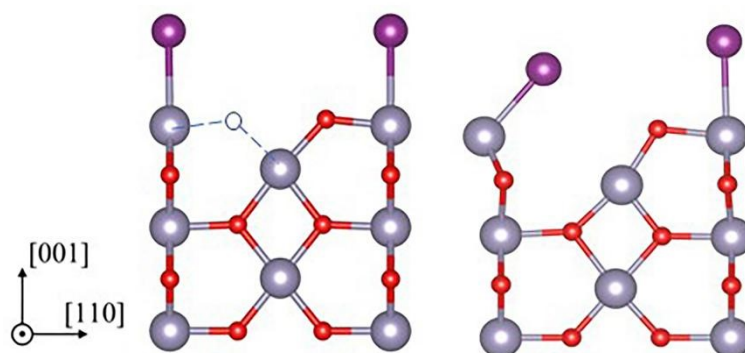

**Fig. S16** The initial a) and final b) structures as removing oxygen atom to form a vacancy, corresponding to site-B in Fig. 4e. An oxygen atom was removed to form a vacancy near the interfaces. The neighboring I atom has been affected by moving toward to the SnO<sub>2</sub> slab by 0.81 Å.

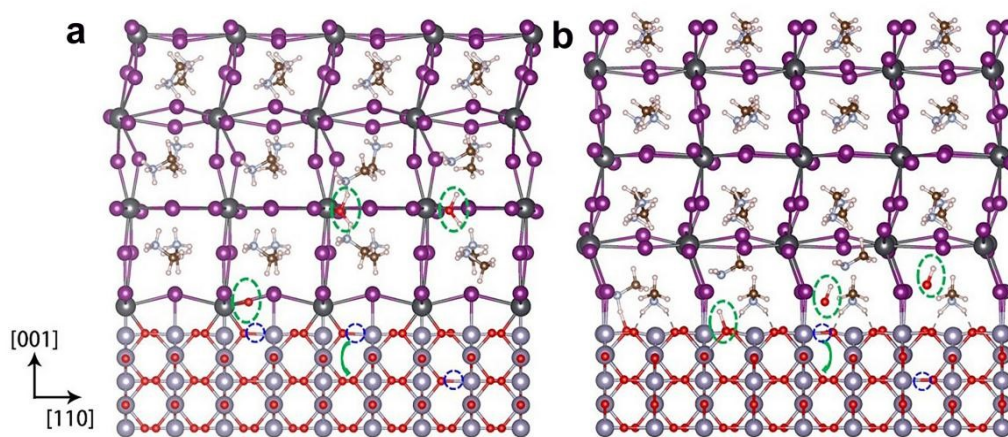

**Fig. S17** Schematic diagram of the reaction process at the MAPbI<sub>3</sub>/SnO<sub>2</sub> interface, for a) Pb-I terminated interface and for b) MA-I terminated interface. Dash blue circles present the oxygen vacancies, dash green ovals indicate the diffusion pathway of oxygen.

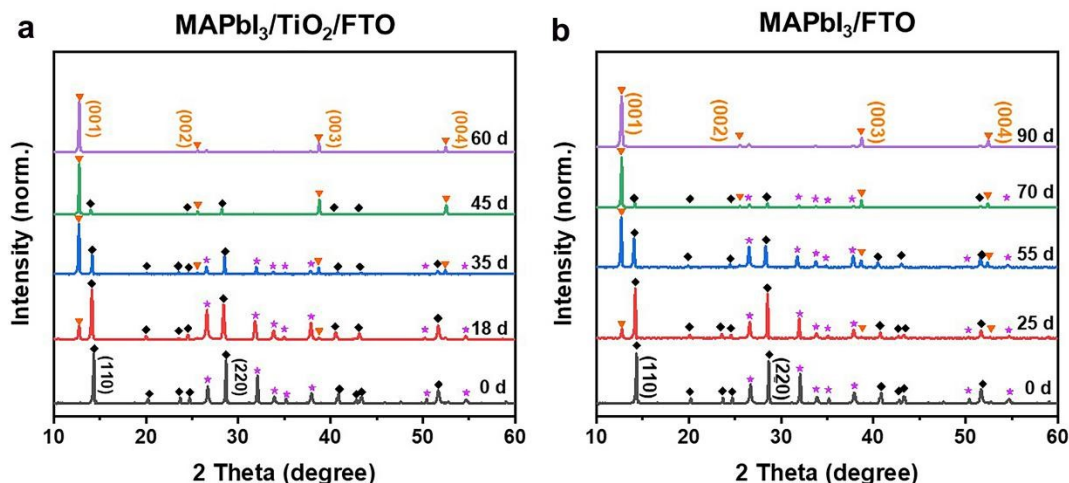

**Fig. S18** X-Ray diffraction pattern analyses of the MAPbI<sub>3</sub> films on TiO<sub>2</sub>-FTO and FTO substrates after thermal treatment for different times. The black indexes correspond to the structure of the tetragonal perovskite and the orange indexes correspond to the structure of lead iodide.

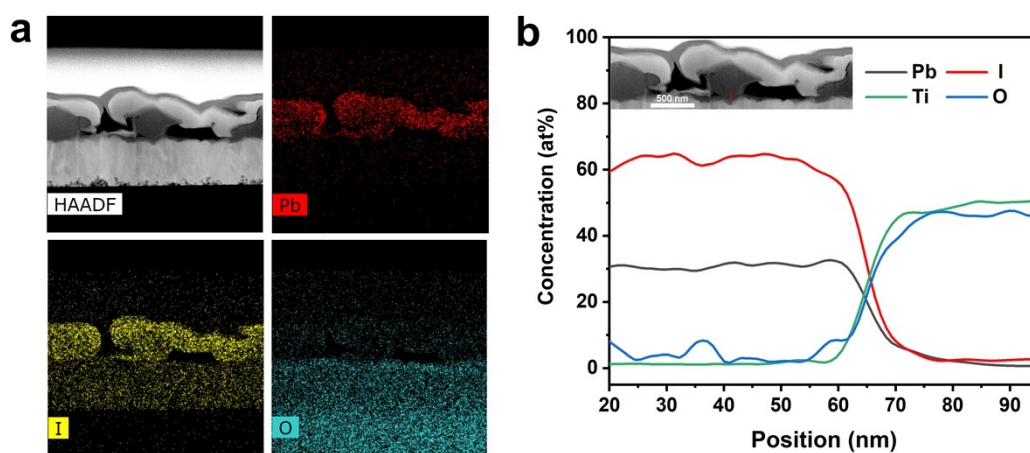

**Fig. S19** The EDS mapping and line scan elementary distribution of the MAPbI<sub>3</sub>/TiO<sub>2</sub>/FTO sample after thermal treatment. **a)** EDS mapping reveals the elementary distribution on cross-sectional MAPbI<sub>3</sub> perovskite films, which is deposited on the TiO<sub>2</sub>-FTO glass and thermally treated at 85 °C for 45 days. **b)** The EDS line scan of the elementary distribution along the red lines at the interfaces between MAPbI<sub>3</sub> and TiO<sub>2</sub> (inset shows the HAADF images of the detail interface, and line scan is selected at the red line area). The thickness of the sample is about 0.25  $\mu$ m.

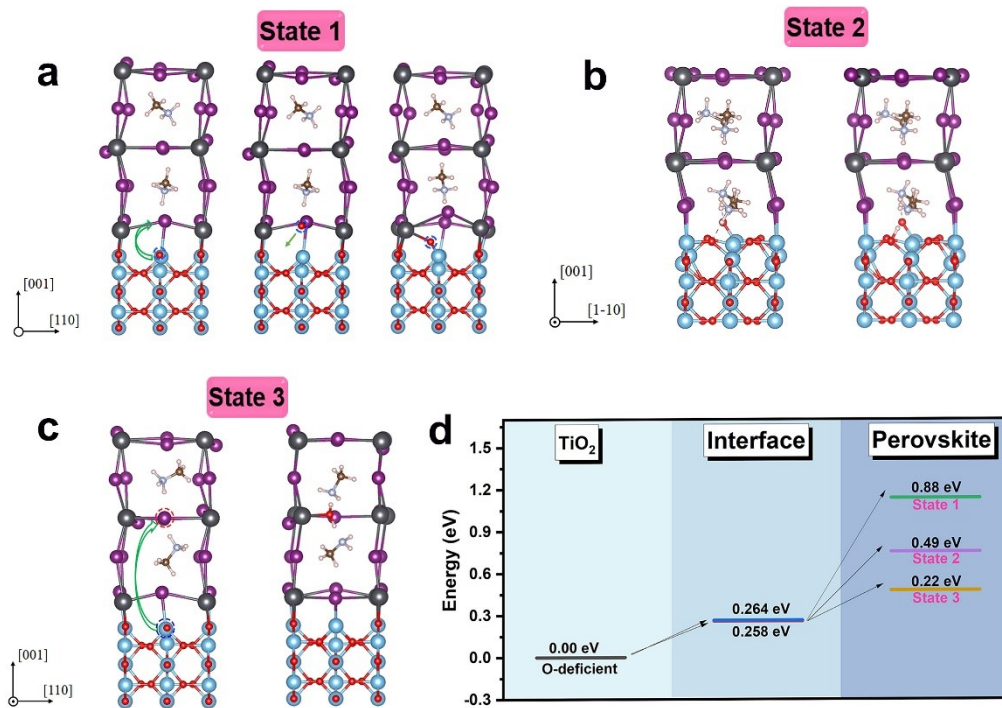

**Fig. S20** **a)** The initial, intermediate, and final structures as one oxygen atom was released into the interfacial core. **b)** The structural changes after H is captured by the oxygen atom at the MAI/TiO<sub>2</sub> interfaces. **c)** The initial and relaxed structures for different layers as an iodine vacancy (red cycle for the iodine atom) was formed and an oxygen atom (blue cycle for the oxygen atom) at the interface diffused into the iodine vacancy. **d)** Diagram for the migration energy of oxygen from the oxygen-deficient TiO<sub>2</sub> surface into the different states of perovskite lattice.

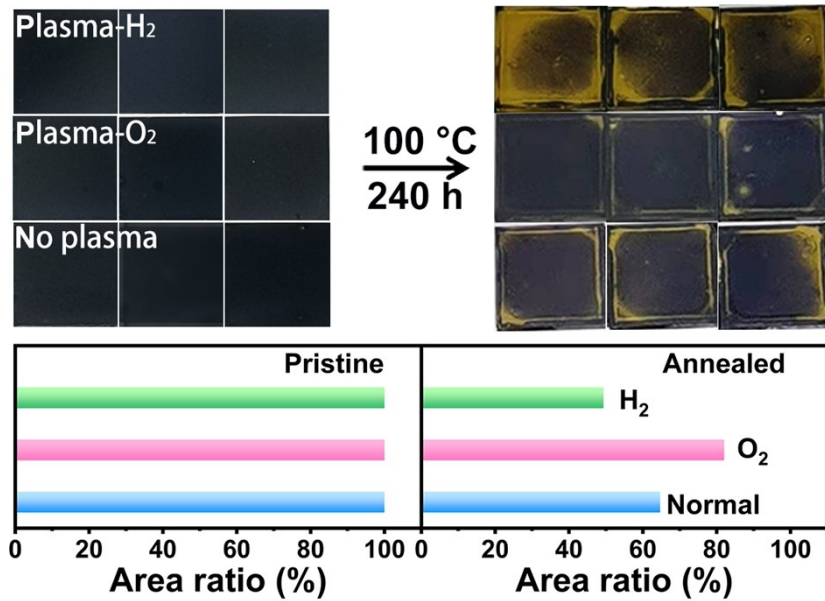

Fig. S21 Thermal stability of  $\text{FA}_{0.9}\text{CS}_{0.1}\text{PbI}_3$  films on the  $\text{H}_2$ ,  $\text{O}_2$  and no plasma treated  $\text{SnO}_2$  layers. After annealing the perovskite films at  $100\text{ }^\circ\text{C}$  for 240 hours, the yellow phase of  $\text{PbI}_2$  generates from the black phase of  $\text{FA}_{0.9}\text{CS}_{0.1}\text{PbI}_3$  films.

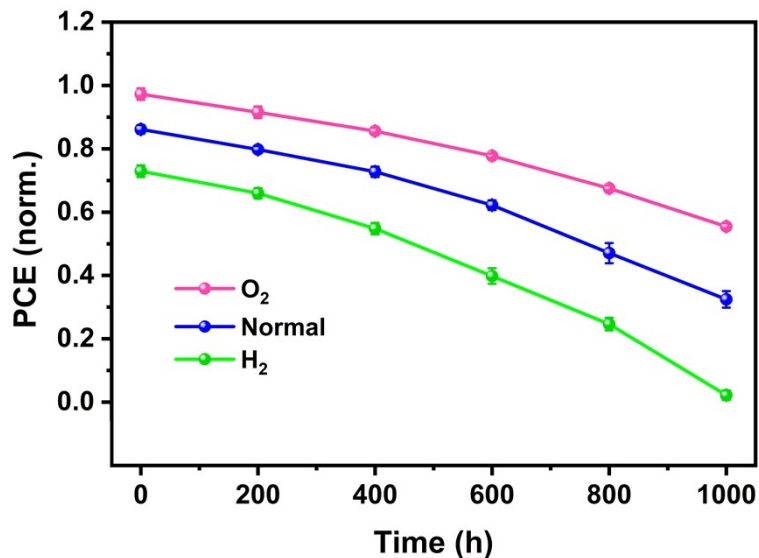

Fig. S22 Evolution for the normalized-PCE of  $\text{FA}_{0.9}\text{CS}_{0.1}\text{PbI}_3$ -based PSCs was analyzed under the thermal annealing condition at  $85\text{ }^\circ\text{C}$  for different times, all the PSC devices were fabricated on different plasma treated  $\text{SnO}_2$  layer.

**Table S1** Calculated net atomic charges (NACs), sum of bond orders (SBOs), and vacancy formation energy ( $E_f^{yo}$ ) at different sites (sites A-F) of SnO<sub>2</sub>/perovskite interfaces.

|                 | Site A | Site B | Site C | Site D | Site E | Site F |
|-----------------|--------|--------|--------|--------|--------|--------|
| NAC             | -0.89  | -0.90  | -0.96  | -0.92  | -0.89  | -0.96  |
| SBO             | 2.05   | 1.83   | 2.01   | 1.93   | 1.67   | 2.04   |
| ${}^a E_f^{yo}$ | 3.18   | 1.72   | 1.91   | 2.20   | 1.66   | 2.21   |
| ${}^b E_f^{yo}$ |        | 1.68   | 0.22   | 0.42   | 0.71   | 0.16   |

${}^a E_f^{yo}$  and  ${}^b E_f^{yo}$  indicates the vacancy formation energy in O-rich and O-poor SnO<sub>2</sub>. The vacancy formation energy is much lower in the oxygen-poor SnO<sub>2</sub> layer ( ${}^b E_f^{yo}$ ).

**Table S2** Calculated  $E_f^{yo}$  at different sites (sites A-F) of TiO<sub>2</sub>/perovskite interfaces.

|                 | Site A | Site B | Site C | Site D | Site E | Site F |
|-----------------|--------|--------|--------|--------|--------|--------|
| ${}^c E_f^{yo}$ | 3.54   | 2.62   | 2.89   | 2.68   | 2.85   | 3.11   |
| ${}^d E_f^{yo}$ | 1.12   | 0.20   | 0.47   | 0.26   | 0.43   | 0.69   |

${}^c E_f^{yo}$  and  ${}^d E_f^{yo}$  indicates the vacancy formation energy in O-rich and O-poor TiO<sub>2</sub>. The vacancy formation energy is much lower in the oxygen-poor TiO<sub>2</sub> layer ( ${}^d E_f^{yo}$ ).



**Table S3** The photovoltaic performance of  $V_{oc}$ ,  $J_{sc}$ , FF and PCE of  $O_2$ -plasma treated MAPbI<sub>3</sub>-based PSCs after thermal annealing at 85 °C for different time (each condition contains 10 samples).

|                      | <b>Time (h)</b> | <b>Voc (V)</b> | <b>Jsc (mA/cm<sup>2</sup>)</b> | <b>FF (%)</b> | <b>PCE (%)</b> |
|----------------------|-----------------|----------------|--------------------------------|---------------|----------------|
| <b>O<sub>2</sub></b> | 0               | 0.97±0.04      | 21.3±1.0                       | 63.0±3.5      | 13.0±0.1       |
|                      | 6               | 1.00±0.03      | 21.5±1.0                       | 66.8±4.0      | 14.4±0.1       |
|                      | 15              | 1.01±0.02      | 22.1±0.7                       | 68.7±3.0      | 15.4±0.1       |
|                      | 24              | 0.98±0.04      | 19.9±1.9                       | 66.8±3.5      | 12.8±0.1       |
|                      | 33              | 0.95±0.03      | 19.7±0.8                       | 59.6±2.8      | 11.1±0.2       |
|                      | 48              | 0.94±0.03      | 18.5±1.0                       | 57.6±3.0      | 10.0±0.1       |
|                      | 65              | 0.92±0.03      | 17.1±1.8                       | 57.4±6.7      | 8.9±0.2        |
|                      | 80              | 0.90±0.05      | 16.7±3.1                       | 56.9±11.1     | 8.3±0.1        |
|                      | 100             | 0.85±0.04      | 15.4±2.0                       | 52.6±6.1      | 6.8±0.3        |
|                      | 120             | 0.73±0.04      | 6.1±0.7                        | 43.5±4.9      | 1.9±0.3        |

**Table S4** The photovoltaic performance of  $V_{oc}$ ,  $J_{sc}$ , FF and PCE of normal MAPbI<sub>3</sub>-based PSCs after thermal annealing at 85 °C for different time (each condition contains 10 samples).

|               | <b>Time (h)</b> | <b>Voc (V)</b> | <b>Jsc (mA/cm<sup>2</sup>)</b> | <b>FF (%)</b> | <b>PCE (%)</b> |
|---------------|-----------------|----------------|--------------------------------|---------------|----------------|
| <b>Normal</b> | 0               | 0.97±0.03      | 21.0±0.4                       | 61.4±3.0      | 12.3±0.2       |
|               | 6               | 0.98±0.03      | 21.4±0.7                       | 64.3±2.8      | 13.5±0.2       |
|               | 12              | 1.00±0.02      | 22.0±1.0                       | 66.8±2.5      | 14.7±0.1       |
|               | 24              | 0.98±0.04      | 19.6±1.2                       | 60.7±4.8      | 11.6±0.1       |
|               | 33              | 0.94±0.07      | 18.8±2.8                       | 56.4±7.5      | 9.8±0.2        |
|               | 48              | 0.93±0.05      | 17.7±2.5                       | 53.2±8.9      | 8.6±0.3        |
|               | 65              | 0.86±0.04      | 15.8±3.3                       | 52.9±10.9     | 6.9±0.3        |
|               | 80              | 0.86±0.12      | 14.8±4.4                       | 50.8±12.9     | 6.0±0.3        |
|               | 100             | 0.77±0.05      | 9.6±1.5                        | 46.0±5.3      | 3.3±0.2        |
|               | 120             | 0.73±0.04      | 6.1±0.7                        | 43.5±4.9      | 1.9±0.3        |

**Table S5** The photovoltaic performance of  $V_{oc}$ ,  $J_{sc}$ , FF and PCE of H<sub>2</sub>-plasma treated MAPbI<sub>3</sub>-based PSCs after thermal annealing at 85 °C for different time (each condition contains 10 samples).

|                      | <b>Time (h)</b> | <b>Voc (V)</b> | <b>Jsc (mA/cm<sup>2</sup>)</b> | <b>FF (%)</b> | <b>PCE (%)</b> |
|----------------------|-----------------|----------------|--------------------------------|---------------|----------------|
| <b>H<sub>2</sub></b> | 0               | 0.95±0.05      | 19.7±1.2                       | 61.2±2.8      | 11.5±0.3       |
|                      | 6               | 0.96±0.05      | 20.8±1.0                       | 64.1±4.0      | 12.7±0.2       |
|                      | 10              | 0.97±0.03      | 21.3±0.7                       | 65.4±2.4      | 13.6±0.2       |
|                      | 24              | 0.97±0.02      | 18.6±1.4                       | 59.7±3.4      | 10.8±0.3       |
|                      | 33              | 0.92±0.04      | 17.6±2.8                       | 53.1±9.8      | 8.4±0.2        |
|                      | 48              | 0.87±0.12      | 17.4±3.8                       | 47.5±12.9     | 6.7±0.3        |
|                      | 65              | 0.80±0.22      | 14.9±4.4                       | 44.8±13.7     | 4.6±0.4        |
|                      | 80              | 0.67±0.07      | 6.3±1.3                        | 43.3±4.7      | 1.7±0.3        |

**Table S6** The photovoltaic performance of open-circuit voltage ( $V_{oc}$ ), current density ( $J_{sc}$ ), fill factor (FF) and PCE of FA<sub>0.9</sub>Cs<sub>0.1</sub>PbI<sub>3</sub>-based PSCs after thermal annealing at 85 °C for different time (each condition contains 10 samples). Here, the “O<sub>2</sub>”, “normal” and “H<sub>2</sub>” indicates the PSCs fabricating on different plasma treated SnO<sub>2</sub> layers.

|                      | Time (h) | Voc (V)   | Jsc (mA/cm <sup>2</sup> ) | FF (%)    | PCE (%)  |
|----------------------|----------|-----------|---------------------------|-----------|----------|
| <b>O<sub>2</sub></b> | 0        | 1.03±0.04 | 23.4±0.6                  | 71.7±3.6  | 18.0±0.2 |
|                      | 200      | 1.03±0.02 | 23.0±0.6                  | 71.7±2.2  | 17.3±0.1 |
|                      | 400      | 1.02±0.01 | 22.4±0.4                  | 71.5±2.1  | 16.4±0.1 |
|                      | 600      | 0.99±0.04 | 22.2±0.2                  | 69.6±3.6  | 15.3±0.1 |
|                      | 800      | 0.99±0.02 | 21.8±1.3                  | 64.8±3.8  | 13.9±0.1 |
|                      | 1000     | 0.98±0.03 | 20.6±1.5                  | 61.8±5.3  | 12.3±0.2 |
| <b>Normal</b>        | 0        | 1.02±0.02 | 22.5±0.3                  | 71.4±2.4  | 16.5±0.2 |
|                      | 200      | 1.02±0.02 | 21.9±1.2                  | 67.3±3.0  | 15.6±0.2 |
|                      | 400      | 0.99±0.04 | 21.8±0.6                  | 67.0±3.2  | 14.7±0.2 |
|                      | 600      | 0.96±0.05 | 21.3±1.1                  | 64.5±4.0  | 13.2±0.2 |
|                      | 800      | 0.93±0.05 | 21.7±1.1                  | 57.7±4.7  | 11.1±0.4 |
|                      | 1000     | 0.91±0.03 | 18.5±1.7                  | 54.7±5.3  | 9.1±0.4  |
| <b>H<sub>2</sub></b> | 0        | 0.99±0.04 | 22.1±1.1                  | 66.3±2.9  | 14.7±0.2 |
|                      | 200      | 0.97±0.04 | 21.1±3.2                  | 64.4±4.7  | 13.7±0.2 |
|                      | 400      | 0.97±0.04 | 20.5±1.4                  | 61.7±5.0  | 12.2±0.2 |
|                      | 600      | 0.95±0.07 | 19.1±2.3                  | 56.8±6.0  | 10.1±0.3 |
|                      | 800      | 0.89±0.01 | 13.5±1.0                  | 54.0±6.6  | 8.1±0.3  |
|                      | 1000     | 0.84±0.03 | 11.2±1.6                  | 53.5±11.4 | 5.0±0.2  |
